# Supplementary material for: The response of a standardized fluid challenge during cardiac surgery on cerebral oxygen saturation measured with near-infrared spectroscopy
Source: Springer Nature journal article supplement (doi:10.1007/s10877-019-00324-w), 2019-05-28
Supplement: MOESM1 [file 16755652]

| Patients with complete data at both FC1 + FC2 (n = 25) stratified on non-responders vs. responders at FC1 |                |                |       |
|-----------------------------------------------------------------------------------------------------------|----------------|----------------|-------|
|                                                                                                           | Non-responders | Responders     | p     |
| <i>Preoperative characteristics</i>                                                                       |                |                |       |
| Age                                                                                                       | 67.55 ± 11.22  | 67.06 ± 10.62  | 0.914 |
| BMI                                                                                                       | 27.77 ± 4.12   | 28.39 ± 3.83   | 0.712 |
| Male gender                                                                                               | 7 (77.8%)      | 15 (93.8%)     | 0.530 |
| <i>Medication</i>                                                                                         |                |                |       |
| Beta blocker                                                                                              | 8 (88.9%)      | 11 (68.8%)     | 0.364 |
| Calcium channel blocker                                                                                   | 2 (22.2%)      | 5 (31.3%)      | 1.000 |
| ACE inhibitor                                                                                             | 5 (55.6%)      | 12 (75%)       | 0.394 |
| Diuretic                                                                                                  | 0 (0%)         | 3 (18.8%)      | 0.280 |
| Statins                                                                                                   | 8 (88.9%)      | 14 (87.5%)     | 1.000 |
| <i>Comorbidity</i>                                                                                        |                |                |       |
| ASA score                                                                                                 | 3.0 ± 0        | 2.94 ± 0.25    | 0.465 |
| Diabetes                                                                                                  | 2 (22.2%)      | 4 (25%)        | 1.000 |
| COPD                                                                                                      | 2 (22.2%)      | 3 (18.8%)      | 1.000 |
| Hypercholesterolemia                                                                                      | 4 (44.4%)      | 10 (62.5%)     | 0.434 |
| Hypertension                                                                                              | 5 (55.6%)      | 11 (68.8%)     | 0.671 |
| <i>Intraoperative data</i>                                                                                |                |                |       |
| Infused fluid at FC [mL]                                                                                  | 364.44 ± 46.87 | 389.38 ± 50.95 | 0.240 |
| Hct start procedure [%]                                                                                   | 36.73 ± 3.88   | 38.75 ± 3.84   | 0.346 |
| Hct end procedure [%]                                                                                     | 32.1 ± 6.52    | 33.98 ± 4.49   | 0.472 |
| Hct difference start-end [%]                                                                              | 4.63 ± 2.7     | 4.8 ± 2.94     | 0.915 |
| OPCAB (opposite to on pump)                                                                               | 9 (100%)       | 14 (87.5%)     | 0.520 |

Table 1A

| Patients with complete data at both FC1 + FC2 (n = 25) stratified on non-responders vs. responders at FC2 |                |               |       |
|-----------------------------------------------------------------------------------------------------------|----------------|---------------|-------|
|                                                                                                           | Non-responders | Responders    | p     |
| <i>Preoperative characteristics</i>                                                                       |                |               |       |
| Age                                                                                                       | 67.0 ± 9.47    | 73.6 ± 9.24   | 0.011 |
| BMI                                                                                                       | 28.18 ± 3.41   | 28.15 ± 4.66  | 0.987 |
| Male gender                                                                                               | 13 (86.7%)     | 9 (90%)       | 1.000 |
| <i>Medication</i>                                                                                         |                |               |       |
| Beta blocker                                                                                              | 11 (73.3%)     | 8 (80%)       | 1.000 |
| Calcium channel blocker                                                                                   | 5 (33.3%)      | 2 (20%)       | 0.659 |
| ACE inhibitor                                                                                             | 11 (73.3%)     | 6 (60%)       | 0.667 |
| Diuretic                                                                                                  | 1 (6.7%)       | 2 (20%)       | 0.543 |
| Statins                                                                                                   | 13 (86.7%)     | 9 (9%)        | 1.000 |
| <i>Comorbidity</i>                                                                                        |                |               |       |
| ASA score                                                                                                 | 2.93 ± 0.26    | 3.0 ± 0       | 0.426 |
| Diabetes                                                                                                  | 4 (26.7%)      | 2 (20%)       | 1.000 |
| COPD                                                                                                      | 4 (26.7%)      | 1 (10%)       | 0.615 |
| Hypercholesterolemia                                                                                      | 10 (66.7%)     | 4 (40%)       | 0.241 |
| Hypertension                                                                                              | 11 (73.3%)     | 5 (50%)       | 0.397 |
| <i>Intraoperative data</i>                                                                                |                |               |       |
| Infused fluid at FC [mL]                                                                                  | 374.33 ± 55.22 | 389.5 ± 42.19 | 0.470 |
| Hct start procedure [%]                                                                                   | 38.63 ± 3.52   | 37.52 ± 4.84  | 0.585 |
| Hct end procedure [%]                                                                                     | 33.78 ± 3.58   | 32.94 ± 6.61  | 0.742 |
| Hct difference start-end [%]                                                                              | 4.91 ± 3.34    | 4.58 ± 2.36   | 0.813 |
| OPCAB (opposite to on pump)                                                                               | 14 (93.3%)     | 9 (90%)       | 1.000 |

Table 1B
